# Supplementary material
Source: PubMed Central journal article supplement (PMC6554666)
Supplement: mmc1.pdf [file mmc1.pdf]

**YMTHE, Volume 27**

**Supplemental Information**

**Engraftment of Human Stem Cell-Derived**

**Otic Progenitors in the Damaged Cochlea**

**Alejandra Lopez-Juarez, Hanae Lahlou, Chantal Ripoll, Yves Cazals, Jean Michel Brezun, Quan Wang, Albert Edge, and Azel Zine**

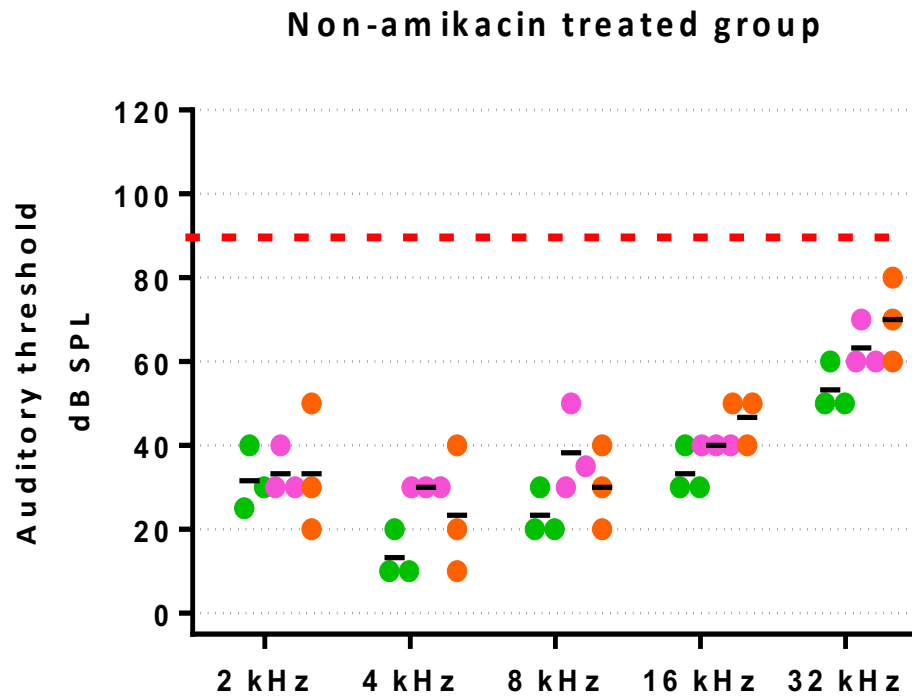

**Figure S1. Delivery of hOPCs in Cochlea without Auditory Dysfunction**

ABRs were registered for each animal before engraftment, 4 days and 14 days post-engraftment in amikacin-treated animals. The auditory thresholds of each animal were compared before and 14 days after engraftment and no shifts in thresholds were observed at the frequencies tested.

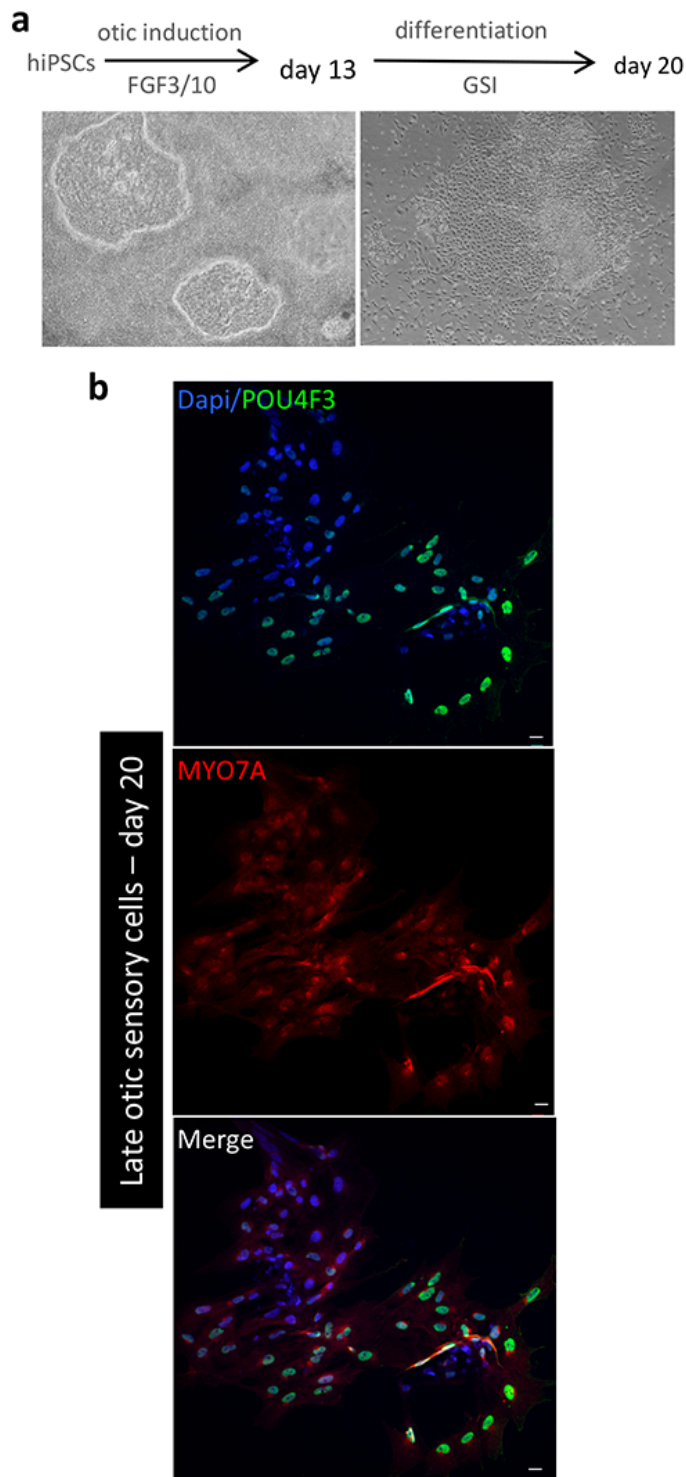

**Figure S2. Expression of Late Otic Sensory Cell Markers after Prolonged Differentiation *in Vitro***

(a) Otic/placodal progenitors from day 13 were maintained for one more week in culture medium supplemented with GSI. (b) After one week *in vitro* (i.e. day 20), a subset of differentiated cells displayed co-expression of two known late otic sensory (MYO7A and POU4F3) markers. Scale bar = 20  $\mu\text{m}$

**Table S1.** List of human qPCR primers

| <b>Gene Name</b> | <b>Forward Primer</b> | <b>Rerverse Primer</b> |
|------------------|-----------------------|------------------------|
| <i>DLX5</i>      | GCTAGCTCCTACCACCAGTAC | GGTTTGCCATTCACCATTCTCA |
| <i>GAPDH</i>     | ACACCATGGGGAAGGTGAAG  | GTGACCAGGCGCCCAATA     |
| <i>GATA3</i>     | CACGGTGCAGAGGTACCC    | AGGGTAGGGATCCATGAAGCA  |
| <i>PAX2</i>      | CGGCTGTGTCAGCAAATCC   | GCTTGGAGCCACCGATCA     |
| <i>PAX8</i>      | GCCCAGTGTCAGCTCCATTA  | GCTGTCCATAGGGAGGTTGAA  |
| <i>BMP4</i>      | CCACAGCACTGGTCTTGAGTA | GGTCCCTGGGATGTTCTCC    |

**Table S2.** List of antibodies

|        | <b>Specie</b> | <b>Provider</b> | <b>Reference</b>   | <b>Dilution</b> |
|--------|---------------|-----------------|--------------------|-----------------|
| PAX2   | rabbit        | Eurogentec      | PRB-276P           | 1:100           |
| IBA1   | rabbit        | Wako            | 019-19741          | 1:200           |
| MYO7A  | mouse         | DHSB            | 138-1              | 1:200           |
| MYO7A  | rabbit        | Proteus         | PTS-25-6790-C050   | 1:200           |
| POU4F3 | mouse         | Abnova          | H-5459-M01(DB9310) | 1:100           |
| SOX2   | goat          | Santa-Cruz      | SC-17320           | 1:200           |

**Video S1. A Grafted Mature Guinea-pig Cochlea that was Rendered Transparent with Bone Clarity.** Human stem cell derived otic progenitors (shown in red) appear distributed along the basal-to-apical longitudinal axis of the damaged cochlea. The ability to see human otic progenitor cell behavior is crucial for stimulating research into the development of a cell-based therapy to cure deafness.
